# Supplementary material for: A machine learning framework for TCP round-trip time estimation
Source: Springer Nature journal article supplement (doi:10.1186/1687-1499-2014-47), 2014-03-26

Average Network Congestion Window Over Time (flows:130)

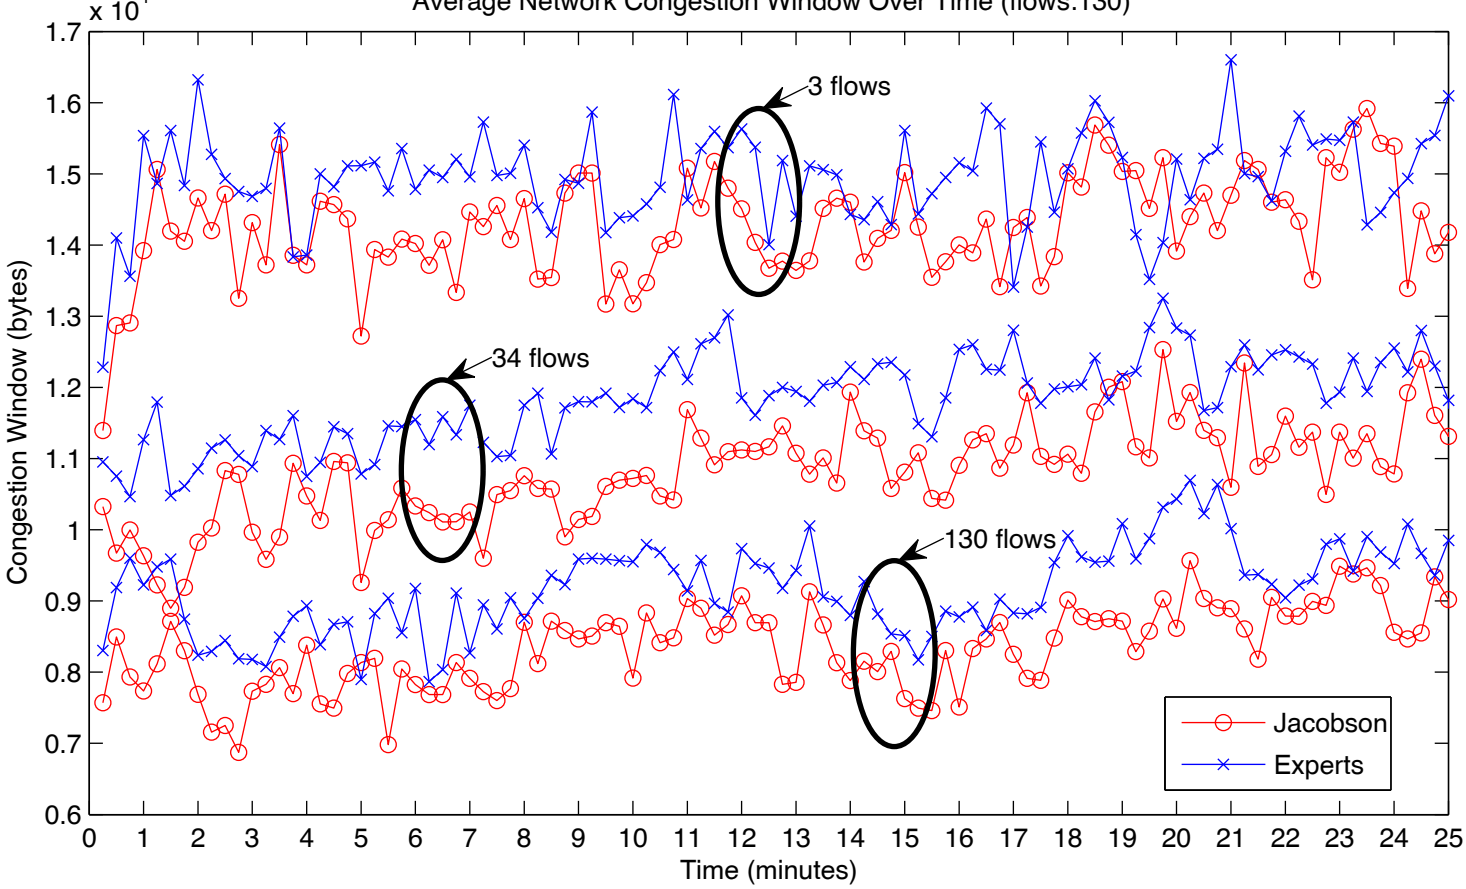

Supplement: 13638_2013_889_MOESM6_ESM.pdf [file 13638_2013_889_MOESM6_ESM.pdf]
